# Supplementary material for: Amplification Refractory Mutation System (ARMS)-PCR for Waxy Sorghum Authentication with Single-Nucleotide Resolution
Source: MDPI journal article supplement (doi:10.3390/foods10092218), 2021-09-18
Supplement: s1 [file s1]

# Supporting information

## **Amplification refractory mutation system (ARMS)-PCR for waxy sorghum authentication with single-nucleotide resolution to avoid contaminants**

Xiaoying Zhu<sup>1</sup>, Minghua Wu<sup>1</sup>, Rujie Deng<sup>1,\*</sup>, Mohammad Rizwan Khan<sup>3</sup>, Sha Deng<sup>1</sup>, Xi Wang<sup>2,\*</sup>, Rosa Busquets<sup>4</sup>, Wanyu Deng<sup>1</sup>, Aimin Luo<sup>1,\*</sup>

<sup>1</sup> College of Biomass Science and Engineering, Healthy Food Evaluation Research Center and Key Laboratory of Food Science and Technology of Ministry of Education of Sichuan Province, Sichuan University, Chengdu 610065, China

<sup>2</sup> Sichuan Langjiu Group Co., Ltd., Luzhou 646523, China

<sup>3</sup> Department of Chemistry, College of Science, King Saud University, Riyadh, 11451, Saudi Arabia

<sup>4</sup> School of Life Sciences, Pharmacy and Chemistry, Kingston University London, Penrhyn Road, Kingston Upon Thames KT1 2EE, United Kingdom

\*Corresponding author

drj17@scu.edu.cn, wangxi15283088230@163.com, luoam@scu.edu.cn

**Table S1.** Oligonucleotide sequences

| Name   | Sequences (5' to 3') |
|--------|----------------------|
| Wxt F0 | CAAATACGACGTGTCAACGG |
| Wxt F1 | CAAATACGACGTGTCAACTG |
| Wxt F2 | CAAATACGACGTGTCAAAGG |
| Wxt F3 | CAAATACGACGTGTCAACAG |
| Wxt F4 | CAAATACGACGTGTCACCGG |
| Wxc F0 | CAAATACGACGTGTCAACGT |
| Wxc F1 | CAAATACGACGTGTCAACTT |
| Wxc F2 | CAAATACGACGTGTCAACCT |
| Wxc F3 | CAAATACGACGTGTCAAAGT |
| Wxc F4 | CAAATACGACGTGTCAACAT |
| R1     | TTGTTGCACTCAGAACCAGC |

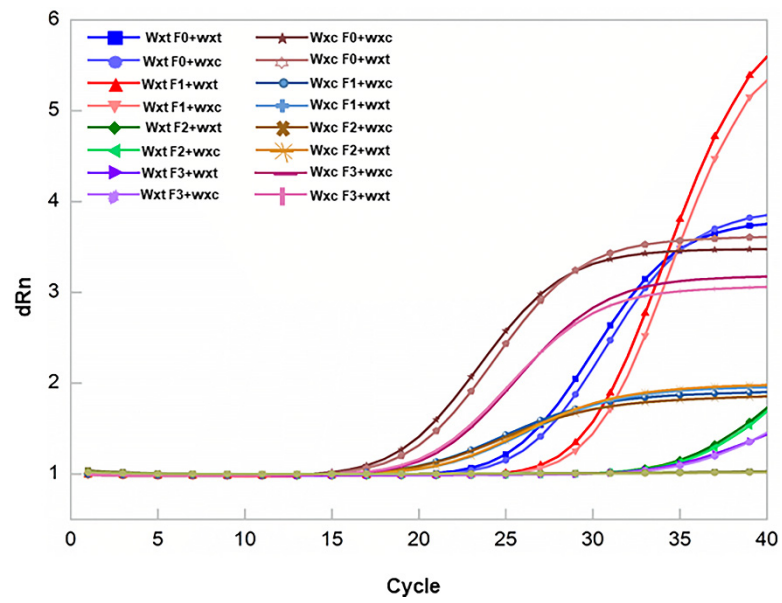

**Figure S1.** Primers screening. Several allele-specific forward primers designed for  $wx^c$  waxy sorghum and non- $wx^c$  sorghum were used for qPCR amplification.

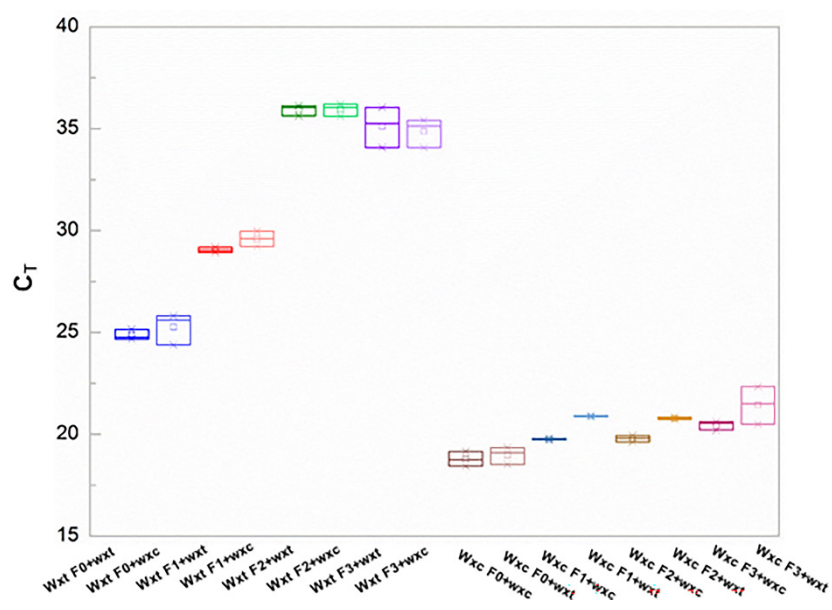

**Figure S2.** C<sub>T</sub> values of qPCR amplification for screening primers that specifically identified wx<sup>c</sup> waxy sorghum and non-wx<sup>c</sup> sorghum. The allele-specific forward primers wx<sup>c</sup> F0,F1,F2,F3 and wx<sup>c</sup> F0, F1, F2 and F3 designed for wx<sup>c</sup> waxy sorghum and non-wx<sup>c</sup> sorghum could not specifically identify wx<sup>c</sup> waxy sorghum or non-wx<sup>c</sup> sorghum.

Hongyingzi.seq CTTTTGACATGTGTCTTGGTTTCTTCTGAAACTGACTGGTTGCCACTTTTCACATACTAGACGGCTTTCTGCATCCACAACTCTCTACCA@GGCAGGTTGGCTTCTGGGACTTCCCGGAGCTGAACCTCCCTGAGAGATTCAA 150  
Jinnuoliang No.6.seq CTTTTGACATGTGTCTTGGTTTCTTCTGAAACTGACTGGTTGCCACTTTTCACATACTAGACGGCTTTCTGCATCCACAACTCTCTACCA@GGCAGGTTGGCTTCTGGGACTTCCCGGAGCTGAACCTCCCTGAGAGATTCAA 150  
L204.seq CTTTTGACATGTGTCTTGGTTTCTTCTGAAACTGACTGGTTGCCACTTTTCACATACTAGACGGCTTTCTGCATCCACAACTCTCTACCA@GGCAGGTTGGCTTCTGGGACTTCCCGGAGCTGAACCTCCCTGAGAGATTCAA 150

Hongyingzi.seq GTCATCCTTCGATTTTCATCGACGGGTATGCAATGAATGGGCAAACTGCAATCTATCAACTATTTTTTCATCAATGGTATTGGGTTAACATAAGGTGACATGAATGTAA@CCCA@CTGGTTTGATTGCAGCTACGAGAACCCGTTGGAG 300  
Jinnuoliang No.6.seq GTCATCCTTCGATTTTCATCGACGGGTATGCAATGAATGGGCAAACTGCAATCTATCAACTATTTTTTCATCAATGGTATTGGGTTAACATAAGGTGACATGAATGTAA@CCCA@CTGGTTTGATTGCAGCTACGAGAACCCGTTGGAG 300  
L204.seq GTCATCCTTCGATTTTCATCGACGGGTATGCAATGAATGGGCAAACTGCAATCTATCAACTATTTTTTCATCAATGGTATTGGGTTAACATAAGGTGACATGAATGTAA@CCCA@CTGGTTTGATTGCAGCTACGAGAACCCGTTGGAG 300

Hongyingzi.seq GCCGGAAGATCAACTGGATGAAGGCCGGGATCTTGAAGCCGACAGGGTCTTCACCGTGAGCCCTACTAGCGGAGGAGCTCATCTCGGCATCGCCAGGGGCTGGAGACTCGACAMCATCATGGGCTCACCGGCATCACCGGGATCG 450  
Jinnuoliang No.6.seq GCCGGAAGATCAACTGGATGAAGGCCGGGATCTTGAAGCCGACAGGGTCTTCACCGTGAGCCCTACTAGCGGAGGAGCTCATCTCGGCATCGCCAGGGGCTGGAGACTCGACAMCATCATGGGCTCACCGGCATCACCGGGATCG 450  
L204.seq GCCGGAAGATCAACTGGATGAAGGCCGGGATCTTGAAGCCGACAGGGTCTTCACCGTGAGCCCTACTAGCGGAGGAGCTCATCTCGGCATCGCCAGGGGCTGGAGACTCGACAMCATCATGGGCTCACCGGCATCACCGGGATCG 450

Hongyingzi.seq TCAACGGCATGGAGCTCAGGAGTGGGATCCAGCAAGGACAGTACATCGCGCTCAATAAGAGCTGTCAAC@GAGACTTTGGCAATTGTTGCTACTCTGCTCATGTAAATCTTTCAAGGCGCTGGTTCTGAGTGCACAAATGTCCAT 600  
Jinnuoliang No.6.seq TCAACGGCATGGAGCTCAGGAGTGGGATCCAGCAAGGACAGTACATCGCGCTCAATAAGAGCTGTCAACG@TGAGCTTTGGCAATTGTTGCTACTCTGCTCATGTAAATCTTTCAAGGCGCTGGTTCTGAGTGCACAAATGTCCAT 600  
L204.seq TCAACGGCATGGAGCTCAGGAGTGGGATCCAGCAAGGACAGTACATCGCGCTCAATAAGAGCTGTCAACG@TGAGCTTTGGCAATTGTTGCTACTCTGCTCATGTAAATCTTTCAAGGCGCTGGTTCTGAGTGCACAAATGTCCAT 600

**Figure S3.** Partial DNA sequence information about ‘Hongyingzi’, ‘Jinnuoliang No.6’ and

‘Jin 204’. ‘Hongyingzi’ was wx<sup>c</sup>, and ‘Jinnuoliang No.6’ was wx<sup>b</sup>, and the ‘Jin 204’ was wild.

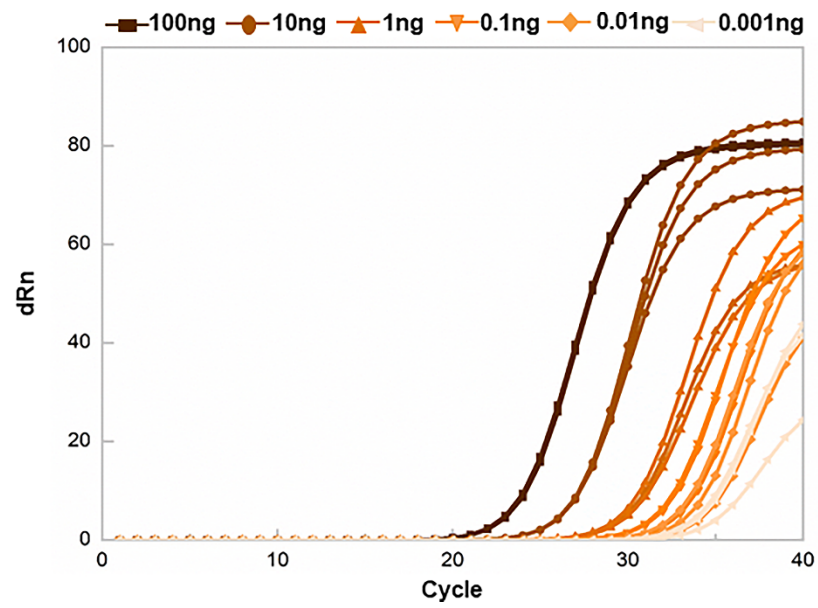

**Figure S4.** The amplification curves of '*Hongyingzi*' DNA samples that were continuously ten-fold diluted from 100.0 ng to 1.0 pg.

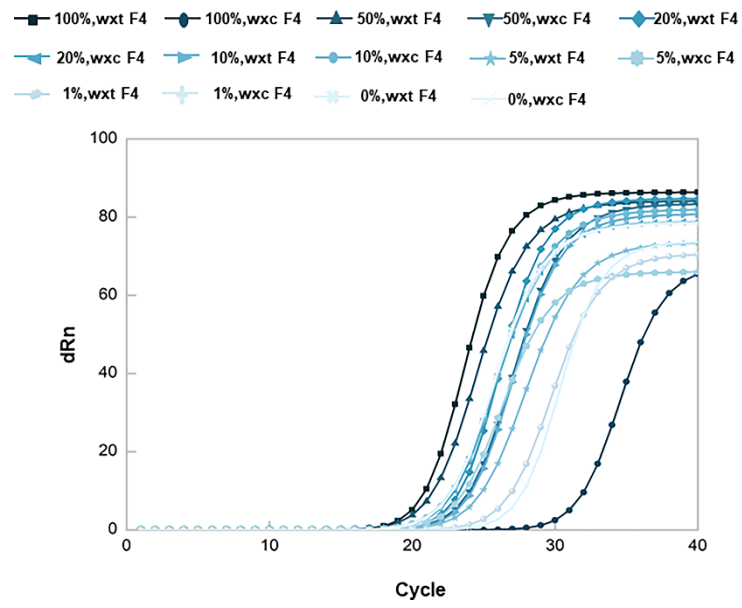

**Figure S5.** Amplification curves of 'Jinnuoliang No.6' with different content ratios in mixtures.
